# Supplementary material for: LncRNA USP2-AS1 Promotes Hepatocellular Carcinoma Growth by Enhancing YBX1-Mediated HIF1α Protein Translation Under Hypoxia
Source: PubMed Central journal article supplement (PMC9174509; doi:10.3389/fonc.2022.882372), 2022-05-25
Supplement: DataSheet_1.pdf [file DataSheet_1.pdf]

**Supplementary information** (Supplementary  
Figures and Tables)

**LncRNA USP2-AS1 promotes hepatocellular  
carcinoma growth by enhancing YBX1-mediated  
HIF1 $\alpha$  protein translation under hypoxia**

**Shi-Ping Chen, Gui-Qi Zhu, Xiao-Xia Xing, Jing-Lei Wan, Jia-Liang  
Cai, Jun-Xian Du, Li-Na Song, Zhi Dai, Jian Zhou**

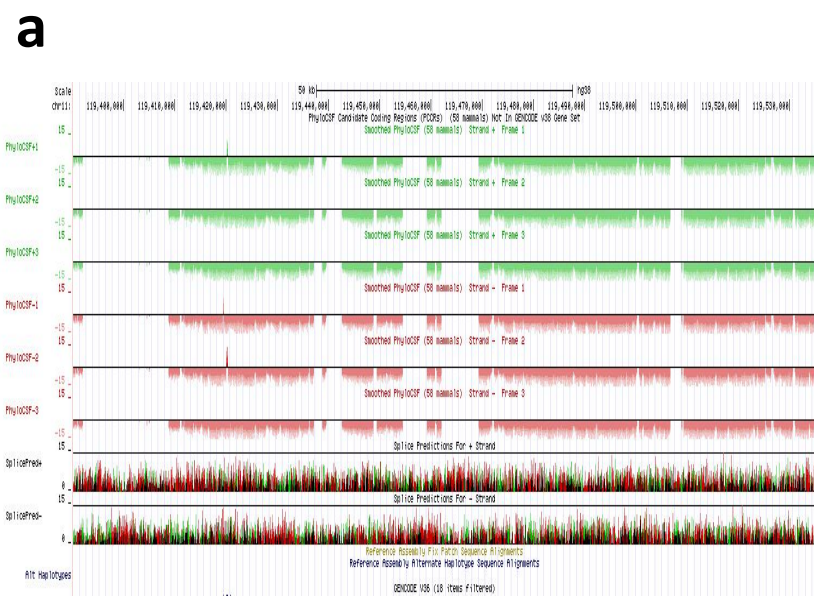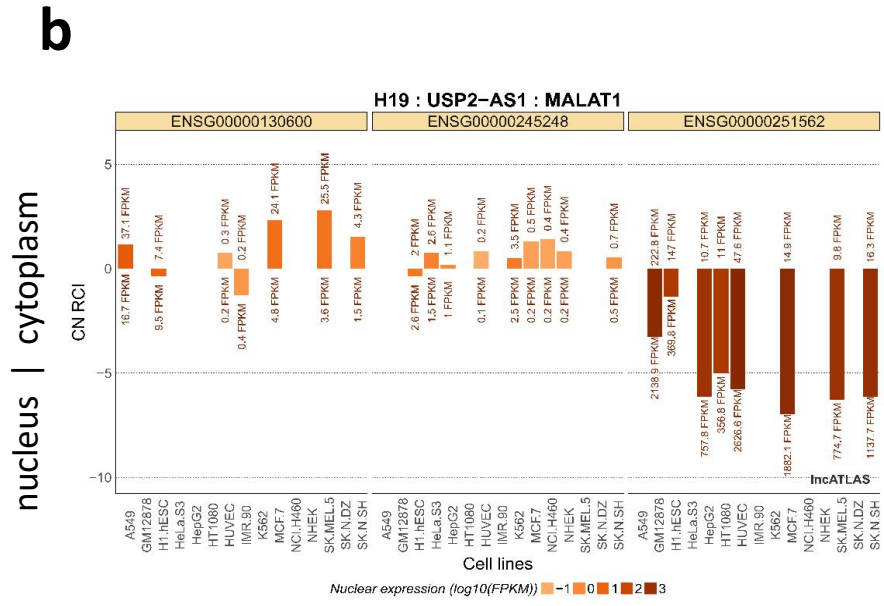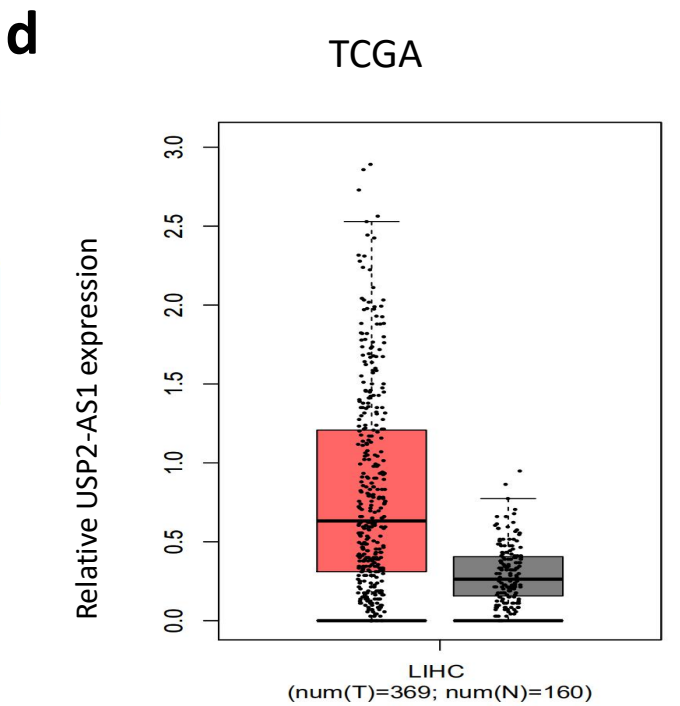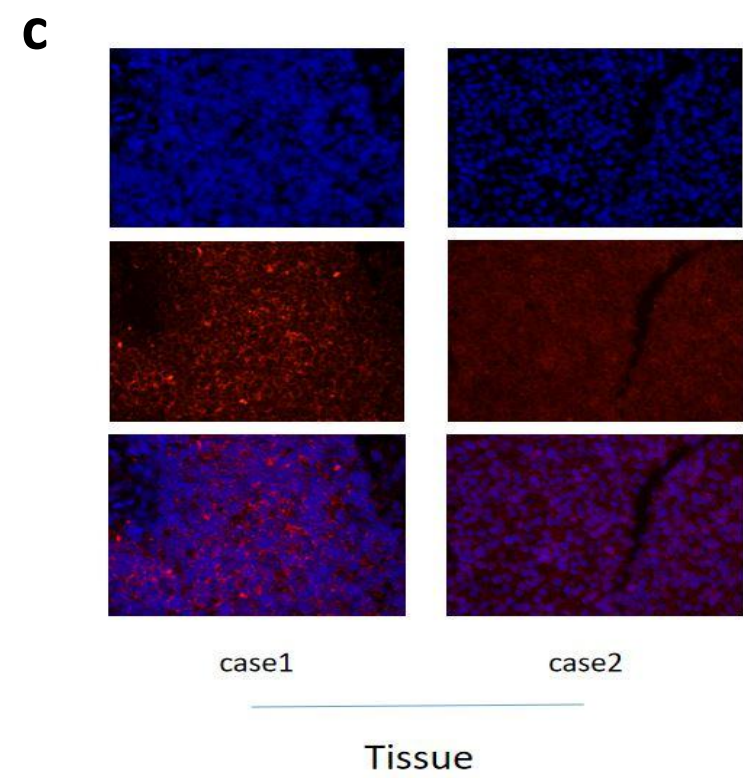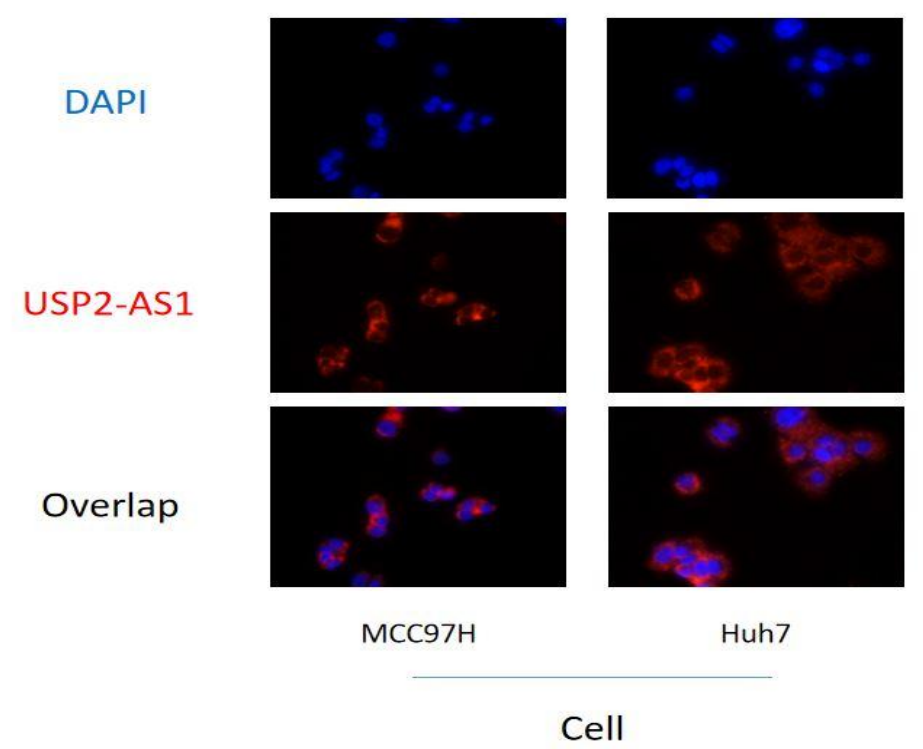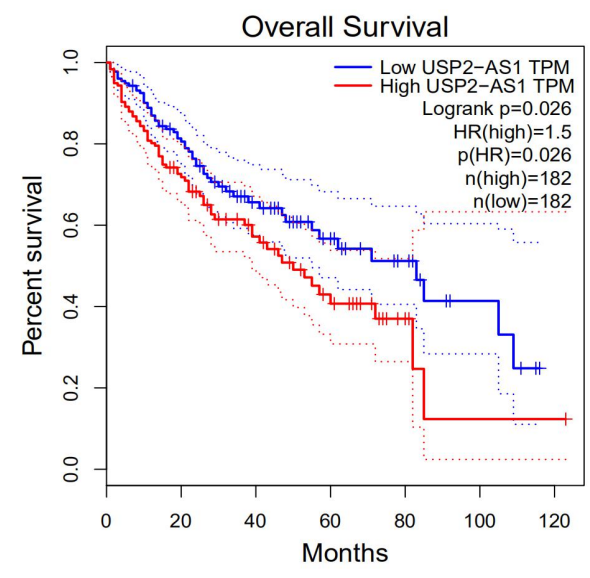

Fig.S1.

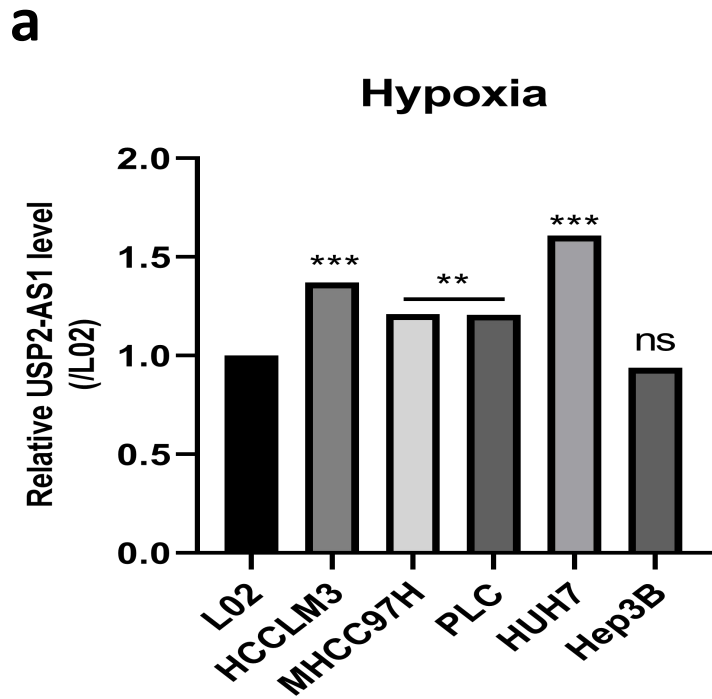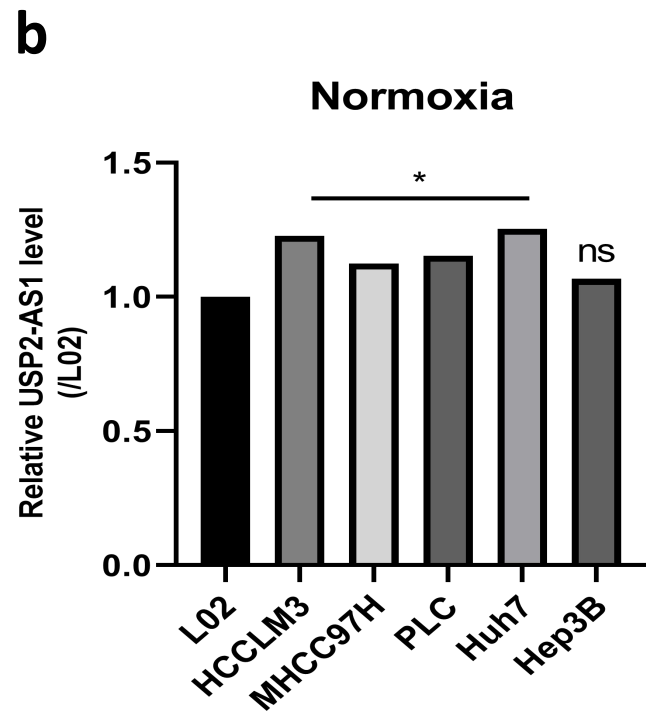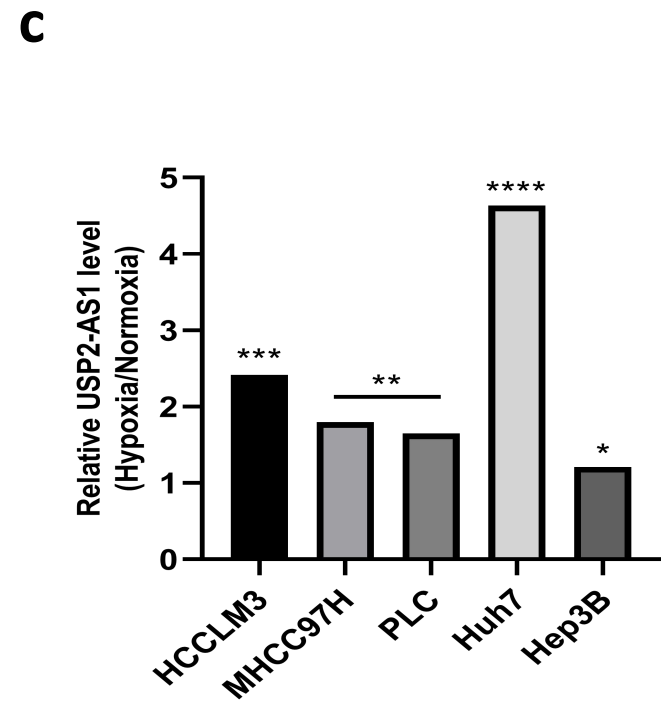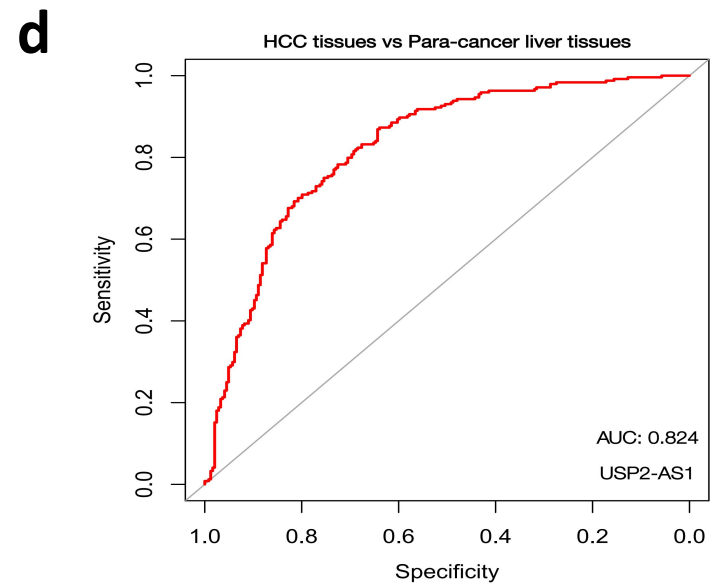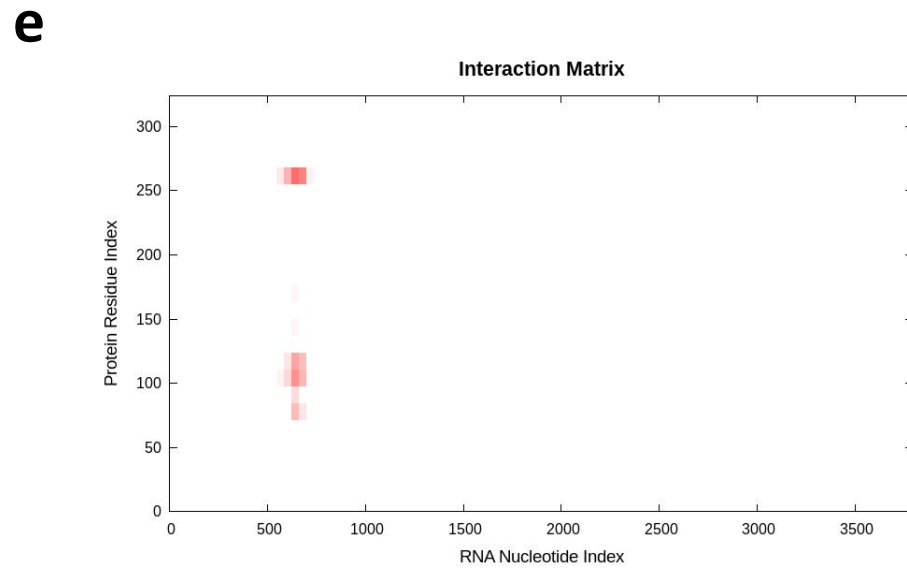

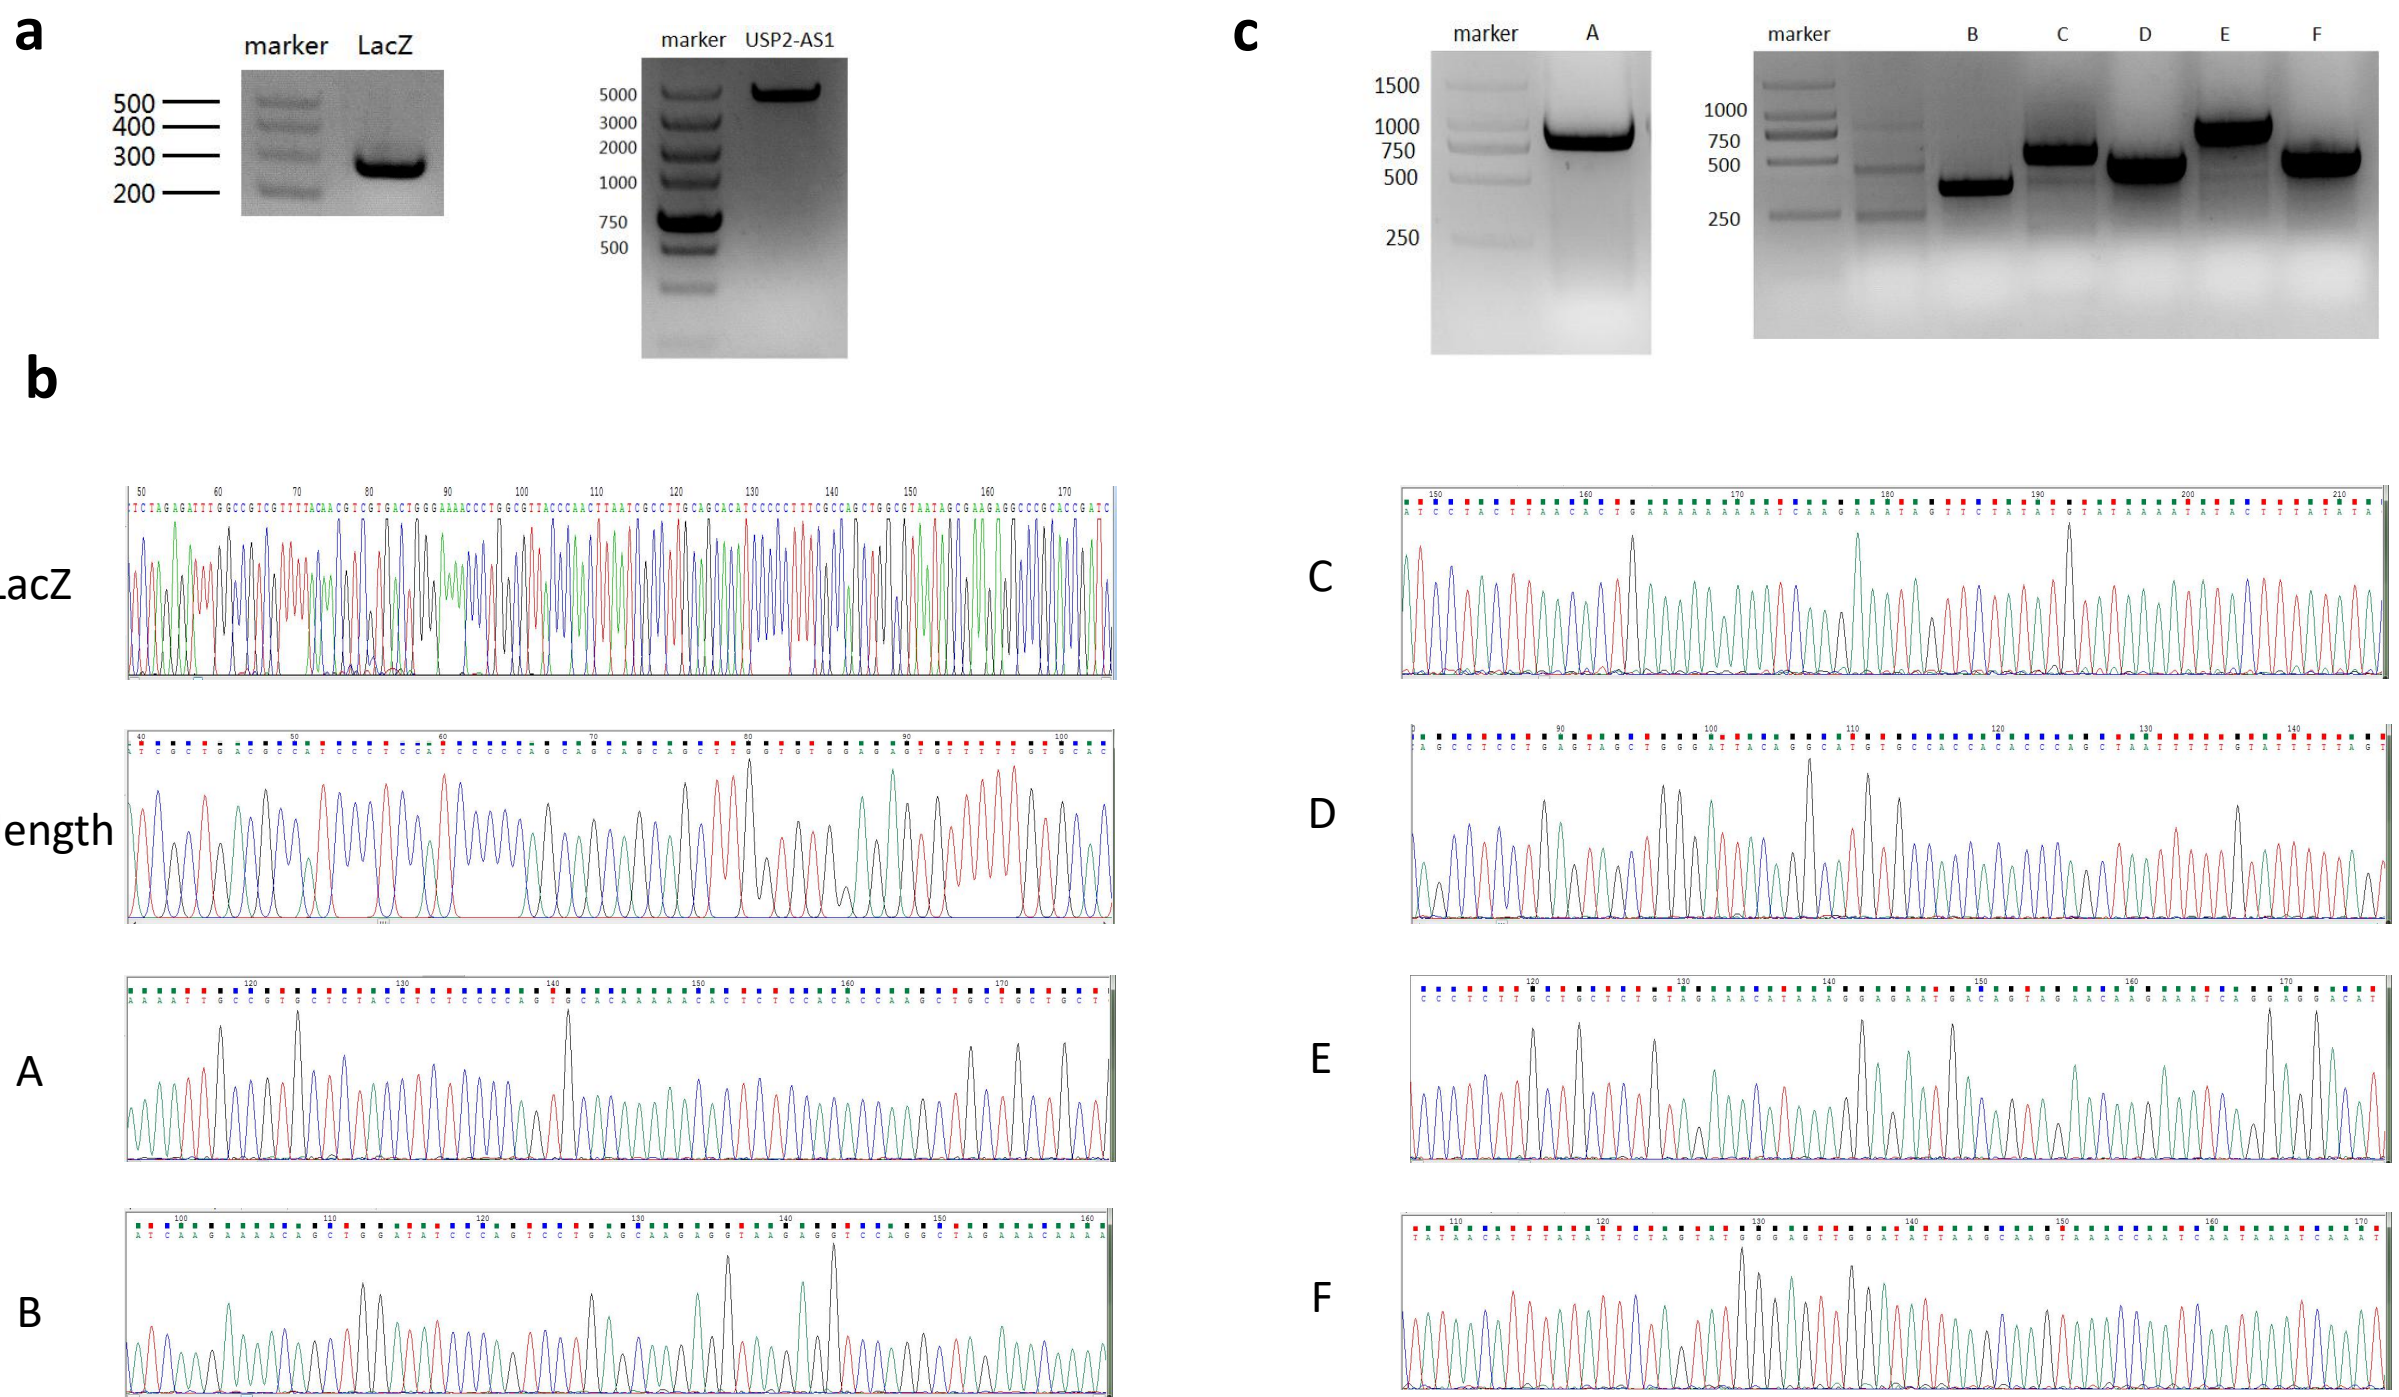

Fig.S3.

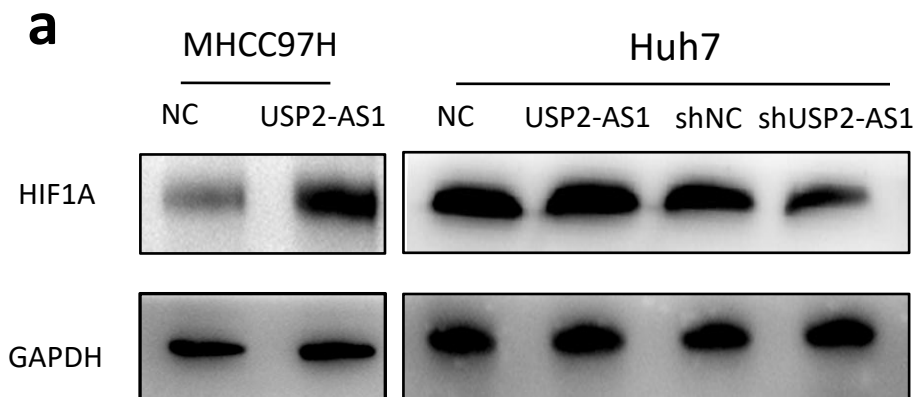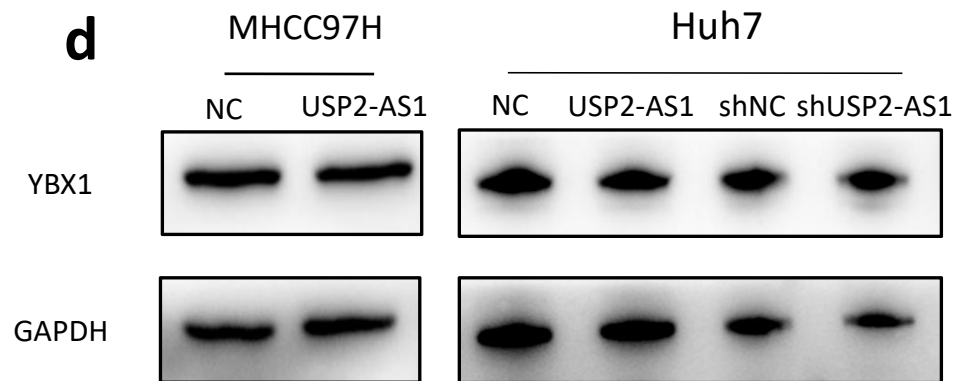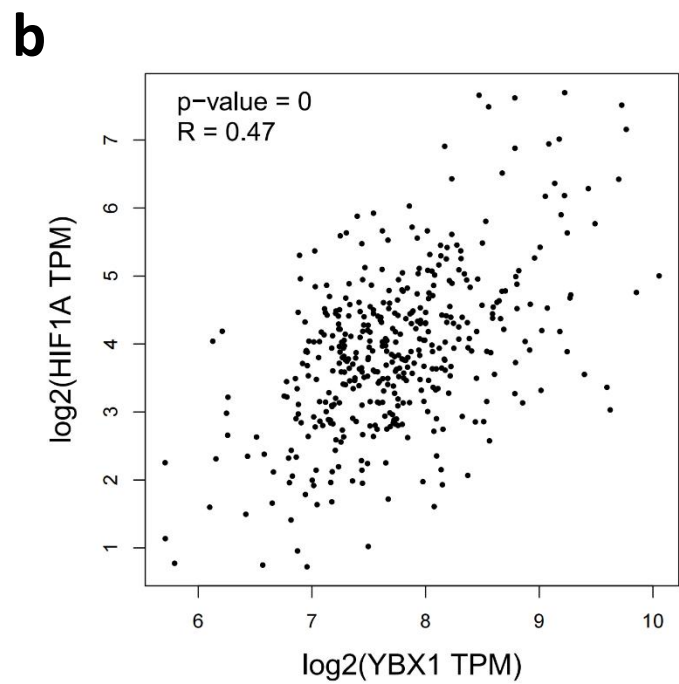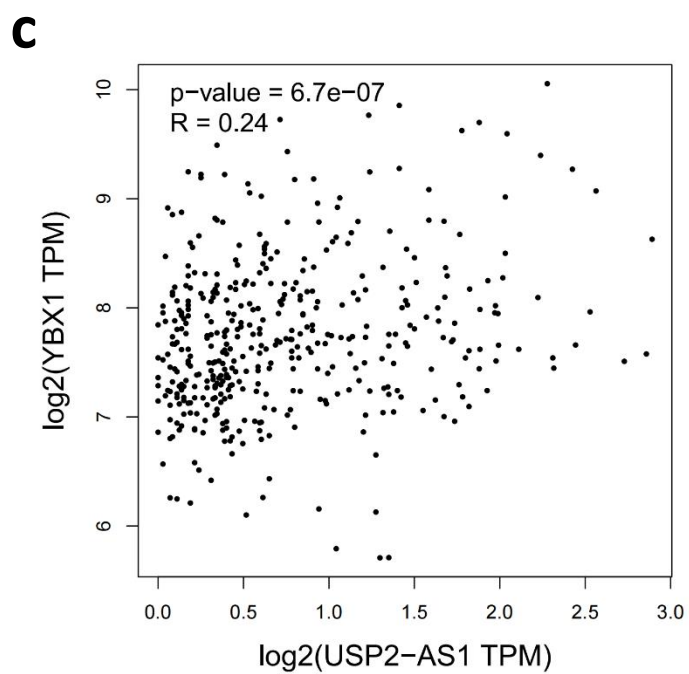

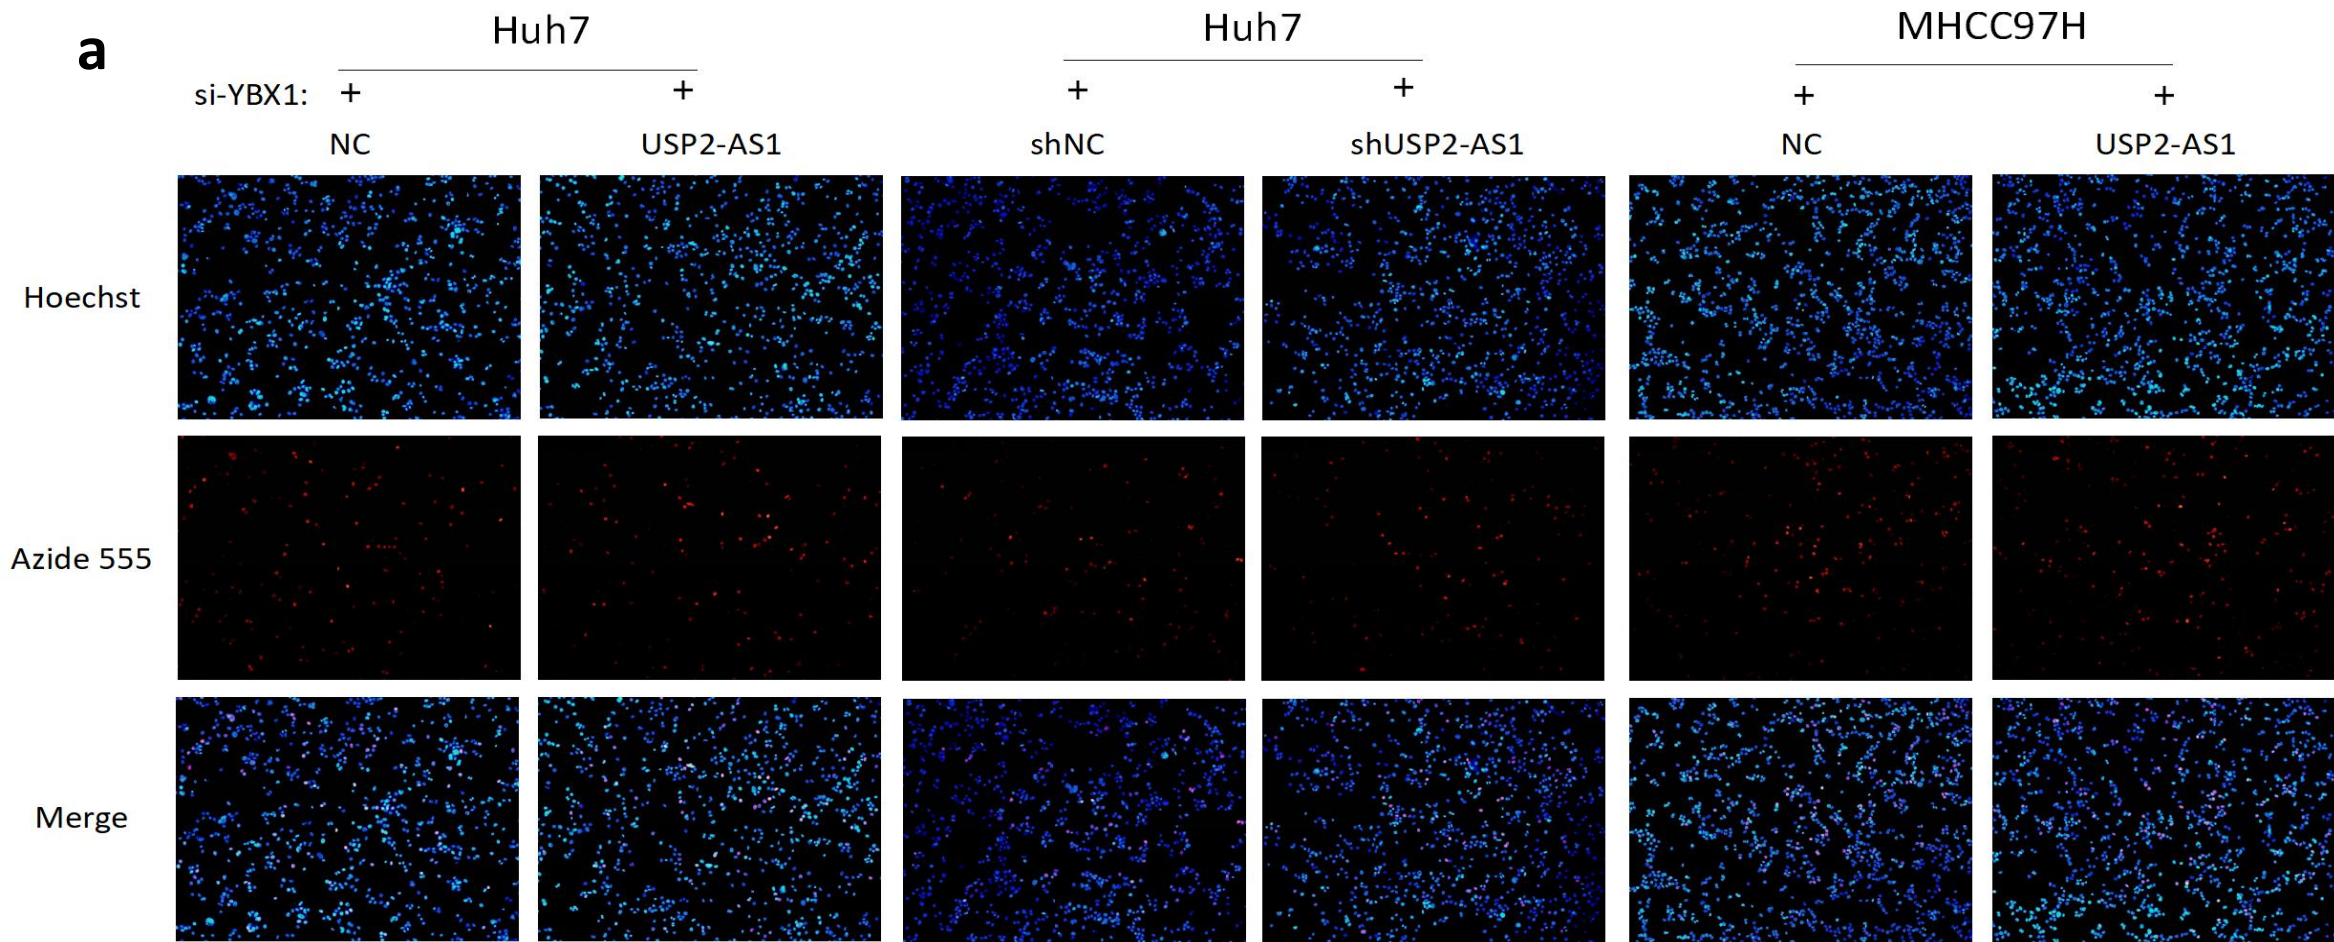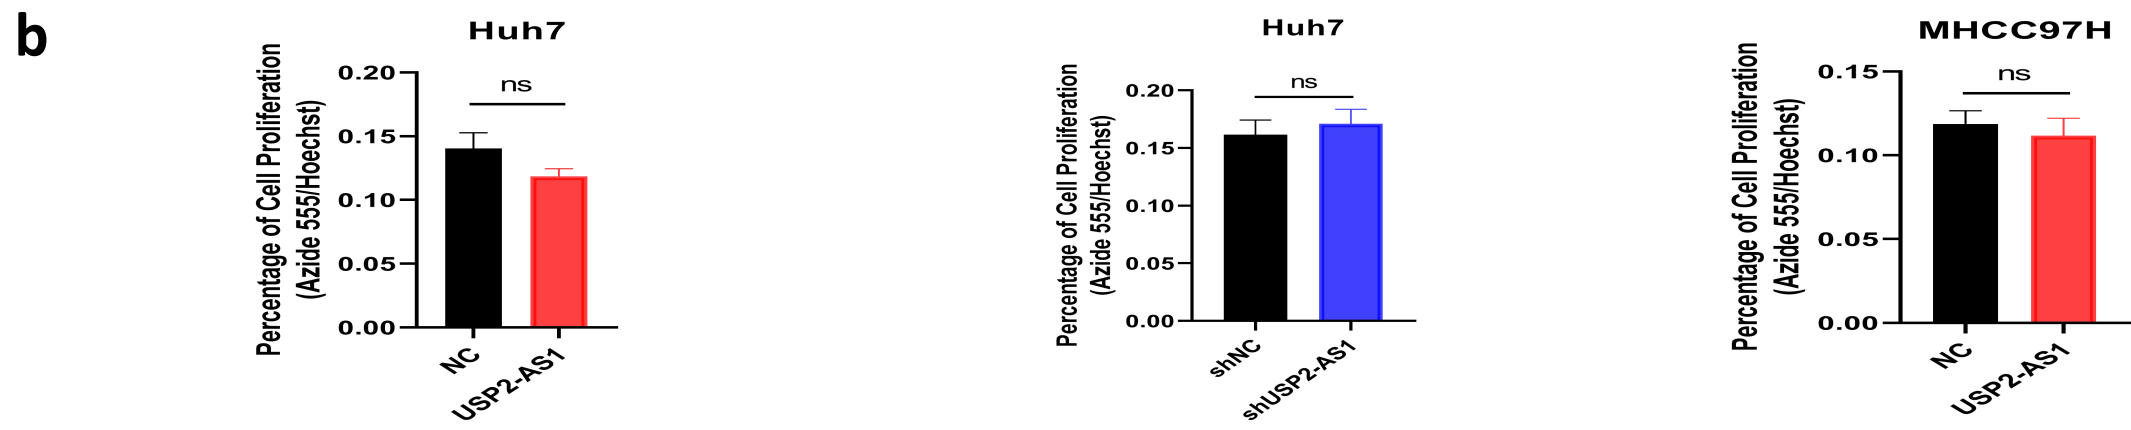

Fig.S5.

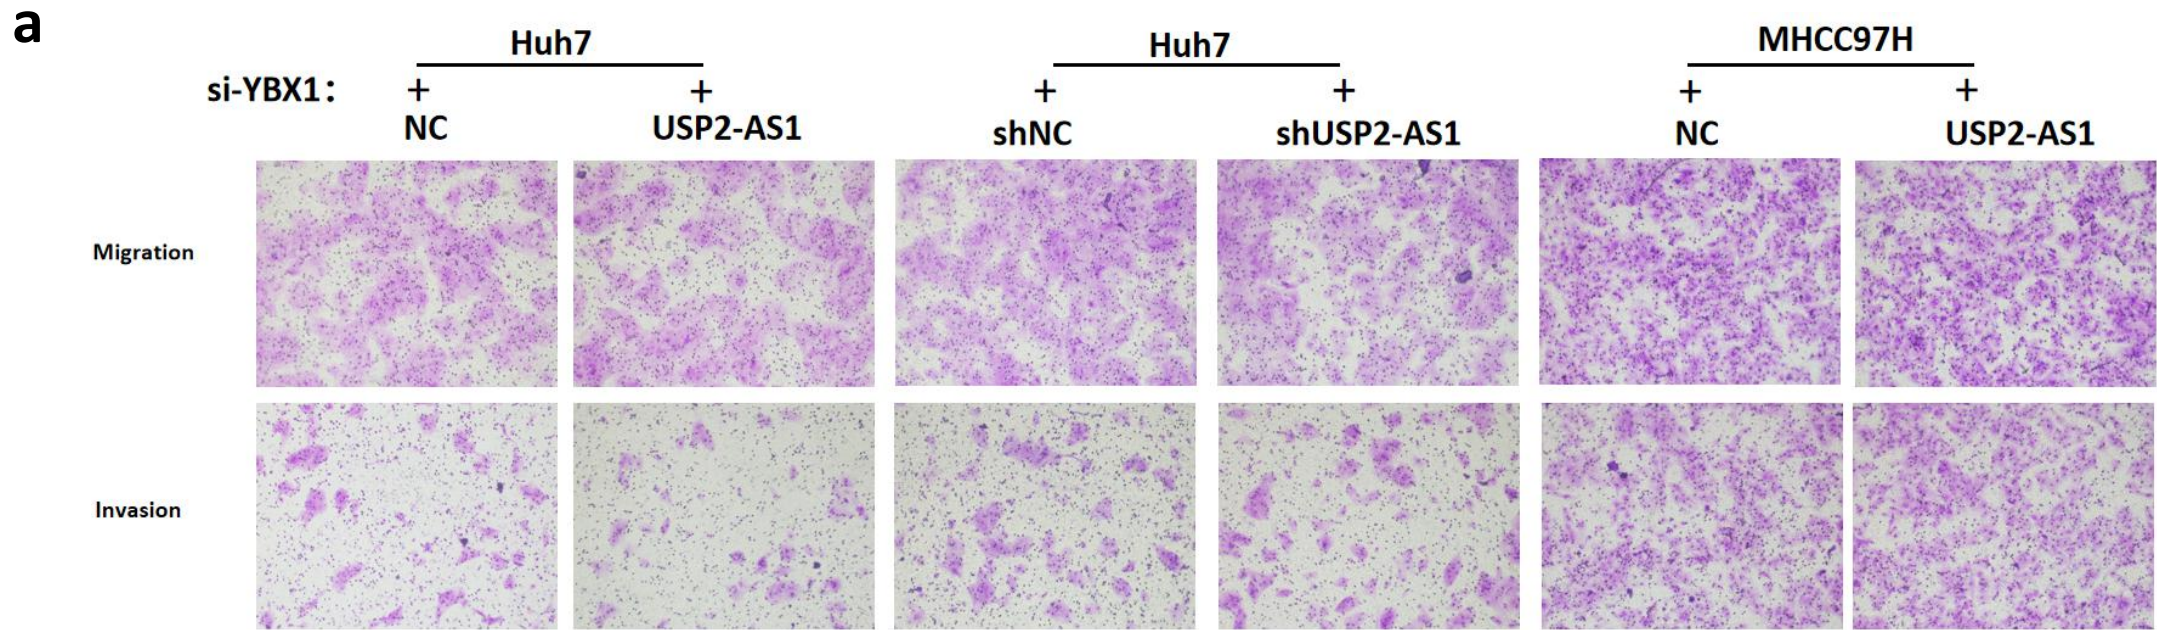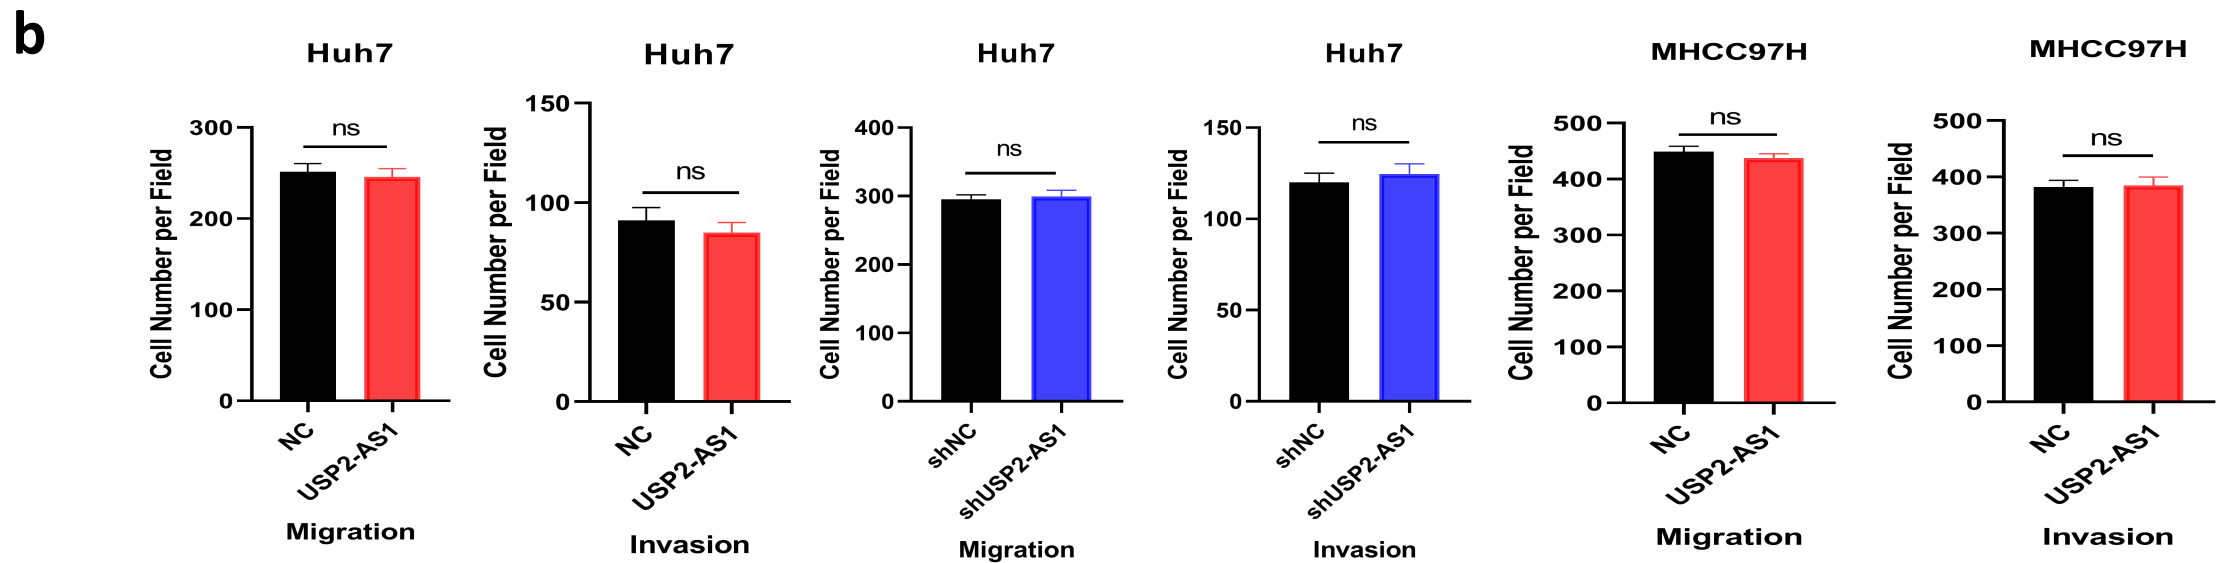

Fig.S6.

### Supplementary Figure legends:

**Fig.S1.** The expression and localization of USP2-AS1. **a** USP2-AS1 has almost no protein-coding, viewed by PhyloCSF in the UCSC Genome Browser (<https://genome.ucsc.edu/>). **b** USP2-AS1 is located in HCC cytoplasm predicted by lncAtlas (<https://lncatlas.crg.eu/>), H19 is mainly located in cytoplasm as a positive contrast, MALAT1 is located in cell nucleus as a negative contrast. **c** USP2-AS1 almost entirely located in HCC cytoplasm by FISH assay (two cases of HCC tissues, HCC cell lines MHCC97H and Huh7 were used). **d** Relative expression of USP2-AS1 and its related prognosis in TCGA-LIHC.

**Fig.S2.** The possible diagnostic value of USP2-AS1. **a-b** USP2-AS1 expression of several HCC cells relative to normal hepatocyte cell line LO2 under hypoxia and normoxia by RT-qPCR. **c** USP2-AS1 expression of several HCC cells under hypoxia higher than normoxia by RT-qPCR, two-tailed Student's t-test, \* $p < 0.05$ , \*\* $p < 0.01$ , and \*\*\* $p < 0.001$ , ns means no statistically significant differences. **d** The area under the ROC curve (AUC-ROC) of USP2-AS1 was 0.824. **e** The binding site of USP2-AS1 to YBX1 was predicted through the online website catRAPID express ([http://service.tartaglialab.com/update\\_submission/380192/4af202c73a](http://service.tartaglialab.com/update_submission/380192/4af202c73a)), the red shaded sections located at 500-1000nt.

**Fig.S3.** Related probes for the RNA pulldown assays. **a** The length identification of negative control probe Laz, full length probe of USP2-AS1. **b** these quencing identification of negative control probe Laz, full length and truncated probe (A-F) of USP2-AS1. **c** The length identification of truncated probe (A-F) of USP2-AS1.

**Fig.S4.** The regulatory effects of lncRNA USP2-AS1 on YBX1 and HIF1A proteins. **a** USP2-AS1 changes HIF1 $\alpha$  protein levels, as measured by WB. **b** The expression of YBX1 and HIF1 $\alpha$  showed a significant positive correlation in the TCGA-LIHC. **c** The positive correlation of expression between YBX1 and USP2-AS1 in TCGA-LIHC. **d** USP2-AS1 overexpression or knockdown does not affect YBX1 proteins compared with the controls.

**Fig.S5.** USP2-AS1 promotes HCC proliferation under hypoxia in vitro which can be blocked by YBX1 knockdown. **a-b** EdU cell proliferation assays confirmed USP2-AS1 under hypoxia affected the proliferative capacity of hepatoma cell lines Huh7 and MHCC97H in vitro and can be blocked by YBX1 knockdown, ns means no statistically significant differences.

**Fig.S6.** USP2-AS1 promotes HCC migration and invasion under hypoxia in vitro and can be blocked by YBX1 knockdown. **a-b** Cell migration and invasion assays confirmed USP2-AS1 under hypoxia affected the migration and invasion capacity of hepatoma cell lines Huh7 and MHCC97H in vitro and can be blocked by YBX1 knockdown. ns means no statistically significant differences.



Table S1 Mass spectrometry proteins from USP2-AS1 RNA pull down in Huh7 cells

| <b>Mass spectrometry proteins from<br/>USP2-AS1 RNA pull down</b> |                      |                  |                   |
|-------------------------------------------------------------------|----------------------|------------------|-------------------|
| <b>Proteins</b>                                                   | <b>Huh7(hypoxia)</b> |                  |                   |
|                                                                   | <b>prot_score</b>    | <b>prot_mass</b> | <b>prot_cover</b> |
| YBX1                                                              | 268                  | 35903            | 29.6              |
| TPM3                                                              | 261                  | 32987            | 21.4              |
| TPM1                                                              | 231                  | 32746            | 18                |
| TPM2                                                              | 224                  | 32945            | 18.7              |
| P4HB                                                              | 153                  | 57480            | 5.5               |
| ACIN1                                                             | 153                  | 152170           | 3.8               |
| TUBB4B                                                            | 137                  | 50255            | 8.8               |
| KRT6B                                                             | 116                  | 60315            | 6.7               |
| FIP1L1                                                            | 114                  | 66601            | 5.4               |
| NACA                                                              | 108                  | 205979           | 0.7               |
| TCOF1                                                             | 96                   | 152243           | 1                 |
| SAP30BP                                                           | 92                   | 33964            | 9.1               |
| HSP90AB1                                                          | 92                   | 83554            | 3.7               |
| LUC7L                                                             | 90                   | 44100            | 4                 |
| CDK11B                                                            | 89                   | 92734            | 2.9               |
| MYO1C                                                             | 88                   | 122461           | 2.7               |
| YWHAZ                                                             | 87                   | 27899            | 5.7               |
| CLINT1                                                            | 84                   | 68273            | 4.3               |

|          |    |        |      |
|----------|----|--------|------|
| SPTAN1   | 83 | 285163 | 0.4  |
| SF3B1    | 81 | 146479 | 1.1  |
| SNRPF    | 79 | 9776   | 15.1 |
| TUBB2B   | 78 | 50377  | 6.1  |
| RPS15    | 76 | 17029  | 9    |
| OSBPL3   | 75 | 102130 | 1.6  |
| CAVIN1   | 73 | 43450  | 7.2  |
| DYNC1I2  | 71 | 71811  | 3.3  |
| CLTC     | 68 | 193260 | 0.7  |
| CPSF4    | 67 | 31261  | 6.7  |
| RPS27A   | 66 | 18296  | 18.6 |
| LTV1     | 64 | 55049  | 3.2  |
| GPATCH8  | 62 | 165010 | 1.1  |
| HNRNPM   | 60 | 77749  | 3    |
| ICAM1    | 59 | 58587  | 2.6  |
| AP3D1    | 58 | 131159 | 1.1  |
| GNAS     | 57 | 111697 | 1.5  |
| TMOD3    | 54 | 39741  | 2.8  |
| RNPS1    | 53 | 34188  | 4.9  |
| PHGDH    | 50 | 57356  | 2.8  |
| ATP5F1B  | 49 | 56525  | 3    |
| HNRNPUL2 | 42 | 85622  | 3.6  |

|        |    |        |     |
|--------|----|--------|-----|
| SPTBN1 | 42 | 275237 | 0.5 |
| WTAP   | 41 | 44388  | 2.8 |
| PLD1   | 40 | 124790 | 1.3 |
| MCM7   | 39 | 81884  | 1.7 |
| DDX5   | 38 | 69618  | 1.3 |
| CALU   | 38 | 37198  | 2.5 |
| WDR83  | 37 | 35119  | 4.4 |
| SSB    | 36 | 46979  | 2.7 |
| HSPA1A | 34 | 70294  | 2   |
| CXXC1  | 34 | 77545  | 1.7 |
| MYO1B  | 32 | 132928 | 0.8 |
| EPRS1  | 31 | 172080 | 0.9 |
| SRSF4  | 31 | 56759  | 1.8 |
| RPL6   | 31 | 32765  | 3.1 |
| HNRNPK | 30 | 51230  | 1.9 |
| ACTN4  | 30 | 105245 | 1.2 |
| ABLIM1 | 30 | 89513  | 2.2 |
| CP     | 29 | 122983 | 0.9 |
| RPS6   | 29 | 28834  | 3.2 |
| PNN    | 28 | 81693  | 1.3 |
| CROCC  | 27 | 228787 | 0.4 |
| MDH1   | 26 | 36631  | 4.8 |

|         |    |        |     |
|---------|----|--------|-----|
| PTCHD3  | 26 | 87842  | 1.3 |
| RPL10A  | 25 | 24987  | 3.7 |
| TENM3   | 23 | 305093 | 0.8 |
| CHERP   | 23 | 104150 | 1.4 |
| ZNF215  | 23 | 60908  | 2.7 |
| RNF17   | 23 | 187205 | 0.6 |
| CAPZA1  | 22 | 33073  | 5.2 |
| SPAG8   | 22 | 51791  | 2.5 |
| DYDC2   | 21 | 20801  | 6.8 |
| RASL11A | 18 | 27160  | 3.3 |
| TRIP12  | 16 | 222234 | 0.6 |
| FGD5    | 13 | 161730 | 0.8 |

**TableS2. Sequences of primers, siRNAs and shRNA used in this study.**

| qRT-PCR primers |         | Sequences               |
|-----------------|---------|-------------------------|
| USP2-AS1        | Forward | GGGAGAGGCAGAGAGATCCA    |
|                 | Reverse | CAAGGGAGCAGGACAGTGAG    |
| GAPDH           | Forward | GGAGCGAGATCCCTCCAAAAT   |
|                 | Reverse | GGCTGTTGTCATACTTCTCATGG |
| YBX1            | Forward | GGATGGCAATGAAGAGGACAAA  |
|                 | Reverse | CGTCTGCGTCGGTAATTGAAGT  |
| HIF1A           | Forward | TGATGACCAGCAACTTGAGG    |
|                 | Reverse | CTGGGGCATGGTAAAAGAAA    |
| HIF2A           | Forward | GTGCATCATGTGTGTCAACTACG |
|                 | Reverse | GGGCTTGAACAGGGATTGAGTC  |
| MAPK1           | Forward | GCTTTTCACTTGCGTGCTCA    |
|                 | Reverse | GGTGCTGTTCCGTGCTACTA    |
| PKM2            | Forward | AGAAAGGTGCCGACTTCCTG    |
|                 | Reverse | CAGCCTCACGAGCTATCAGG    |
| ANKRD37         | Forward | ATTCTTACCTGTCGGGGTGC    |
|                 | Reverse | CTGAGCACGGCAACACAATC    |
| SLC16A3         | Forward | CCATGCTCTACGGGACAGG     |
|                 | Reverse | GCTTGCTGAAGTAGCGGTT     |
| EGR1            | Forward | CCCCGACTACCTGTTCCAC     |
|                 | Reverse | TTCTGCCGCAAGTGGATCTT    |
| ABCB1           | Forward | TTGCTGCTTACATTCAGGTTTCA |
|                 | Reverse | AGCCTATCTCCTGTGCGATTA   |
| GLUT1           | Forward | GGAATCCATCATGGGCAACA    |
|                 | Reverse | CTAGCGGATGGTCATGAGT     |
| LGALS1          | Forward | TCGCCAGCAACCTGAATCTC    |
|                 | Reverse | GCACGAAGCTCTTAGCGTCA    |
| VEGF            | Forward | GAGGAGCAGTTACGGTCTGTG   |
|                 | Reverse | TCCTTTCCTTAGCTGACACTTGT |
| ShUSP2-AS1      | Forward | GGAACTCACAACACACGGGA    |
|                 | Reverse | TTGCACAAGATGACAGGGCT    |
| YBX1-siRNA1     |         | GGACGGCAATGAAGAAGA      |
| YBX1-siRNA2     |         | CCACGCAATTACCAGCAAA     |
| YBX1-siRNA3     |         | GCAGACCGTAACCATTATA     |
